# Supplementary material for: Amphiphilic Block Copolymers Bearing Hydrophobic γ-Tocopherol Groups with Labile Acetal Bond
Source: Polymers (Basel). 2019 Dec 25;12(1):36. doi: 10.3390/polym12010036 (PMC7023524; doi:10.3390/polym12010036)
Supplement: Supplementary file 1 [file polymers-12-00036-s001.pdf]

## Supplementary Materials

### Amphiphilic Block Copolymer Bearing Hydrophobic $\gamma$ -Tocopherol Groups with Labile Acetal Bond

Shotaro Yukioka <sup>1</sup>, Takuya Kitadume <sup>2</sup>, Suchismita Chatterjee <sup>2</sup>, Gan Ning <sup>2</sup>, Tooru Ooya <sup>2</sup> and Shin-ichi Yusa <sup>1,\*</sup>

<sup>1</sup>Graduate School of Engineering, University of Hyogo, 2167 Shosha, Himeji, Hyogo 671-2280, Japan

<sup>2</sup>Graduate School of Engineering, Kobe University, 1-1 Rokkoudai, Nada, Kobe, Hyogo 657-8501, Japan

\*Correspondence: yusa@eng.u-hyogo.ac.jp

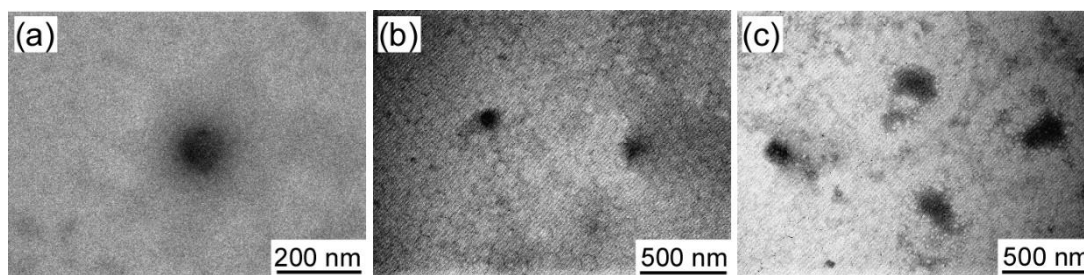

**Figure S1.** TEM images of PEG<sub>54</sub>-P(AA/VE6/ $\gamma$ TCP29)<sub>140</sub> at  $C_p = 0.10$  g/L in PBS buffer of pH 7.4 (a), in acetate buffer of pH 5.2 just after preparation (b) and after 60 h (c).
